# Supplementary material
Source: Research Square preprint supplement (doi:10.21203/rs.3.rs-8920265/v1)
Supplement: Supplementary file 1 [file c56cd299a3d7c1591c2f238c.docx]

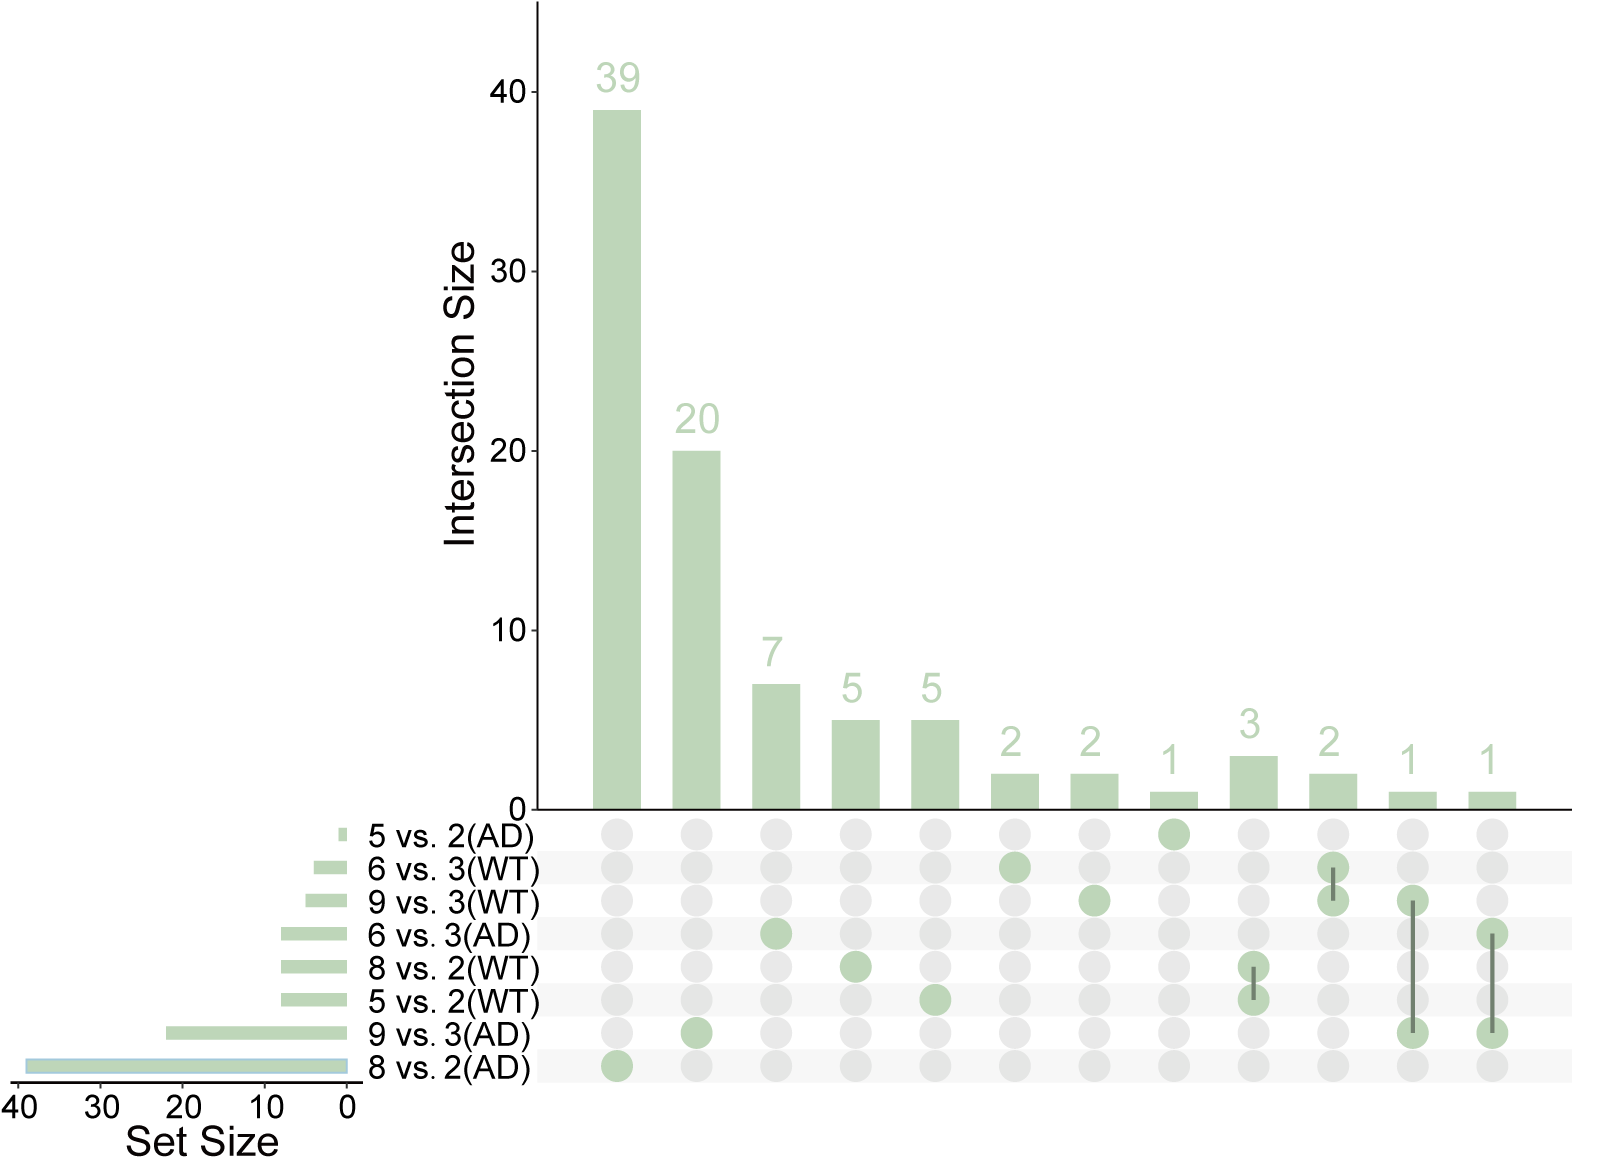


**Fig. S1** Venn diagram showing the intersect of disease-specific down-regulated genes in hippocampus.


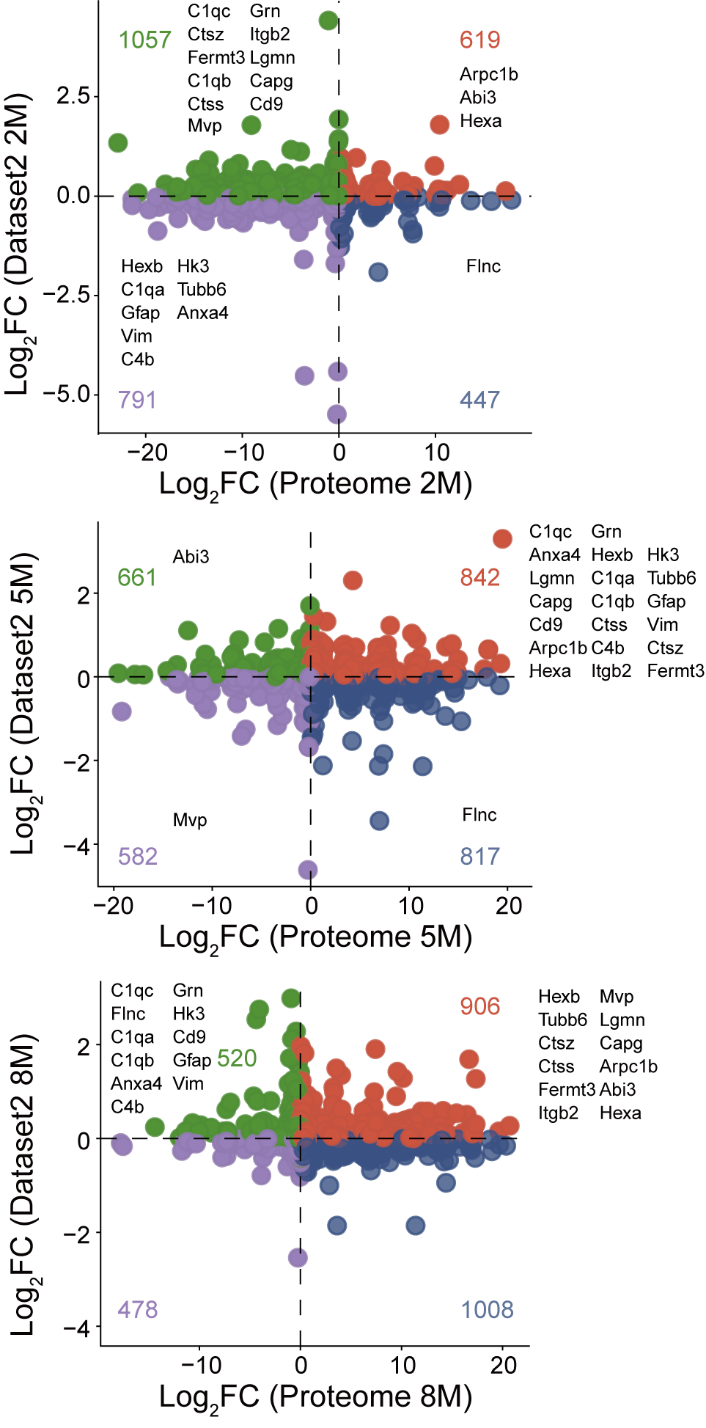


**Fig. S2** Scatter plots showing the expression patterns in bulk RNA-seq dataset2 and proteomics dataset different time points.


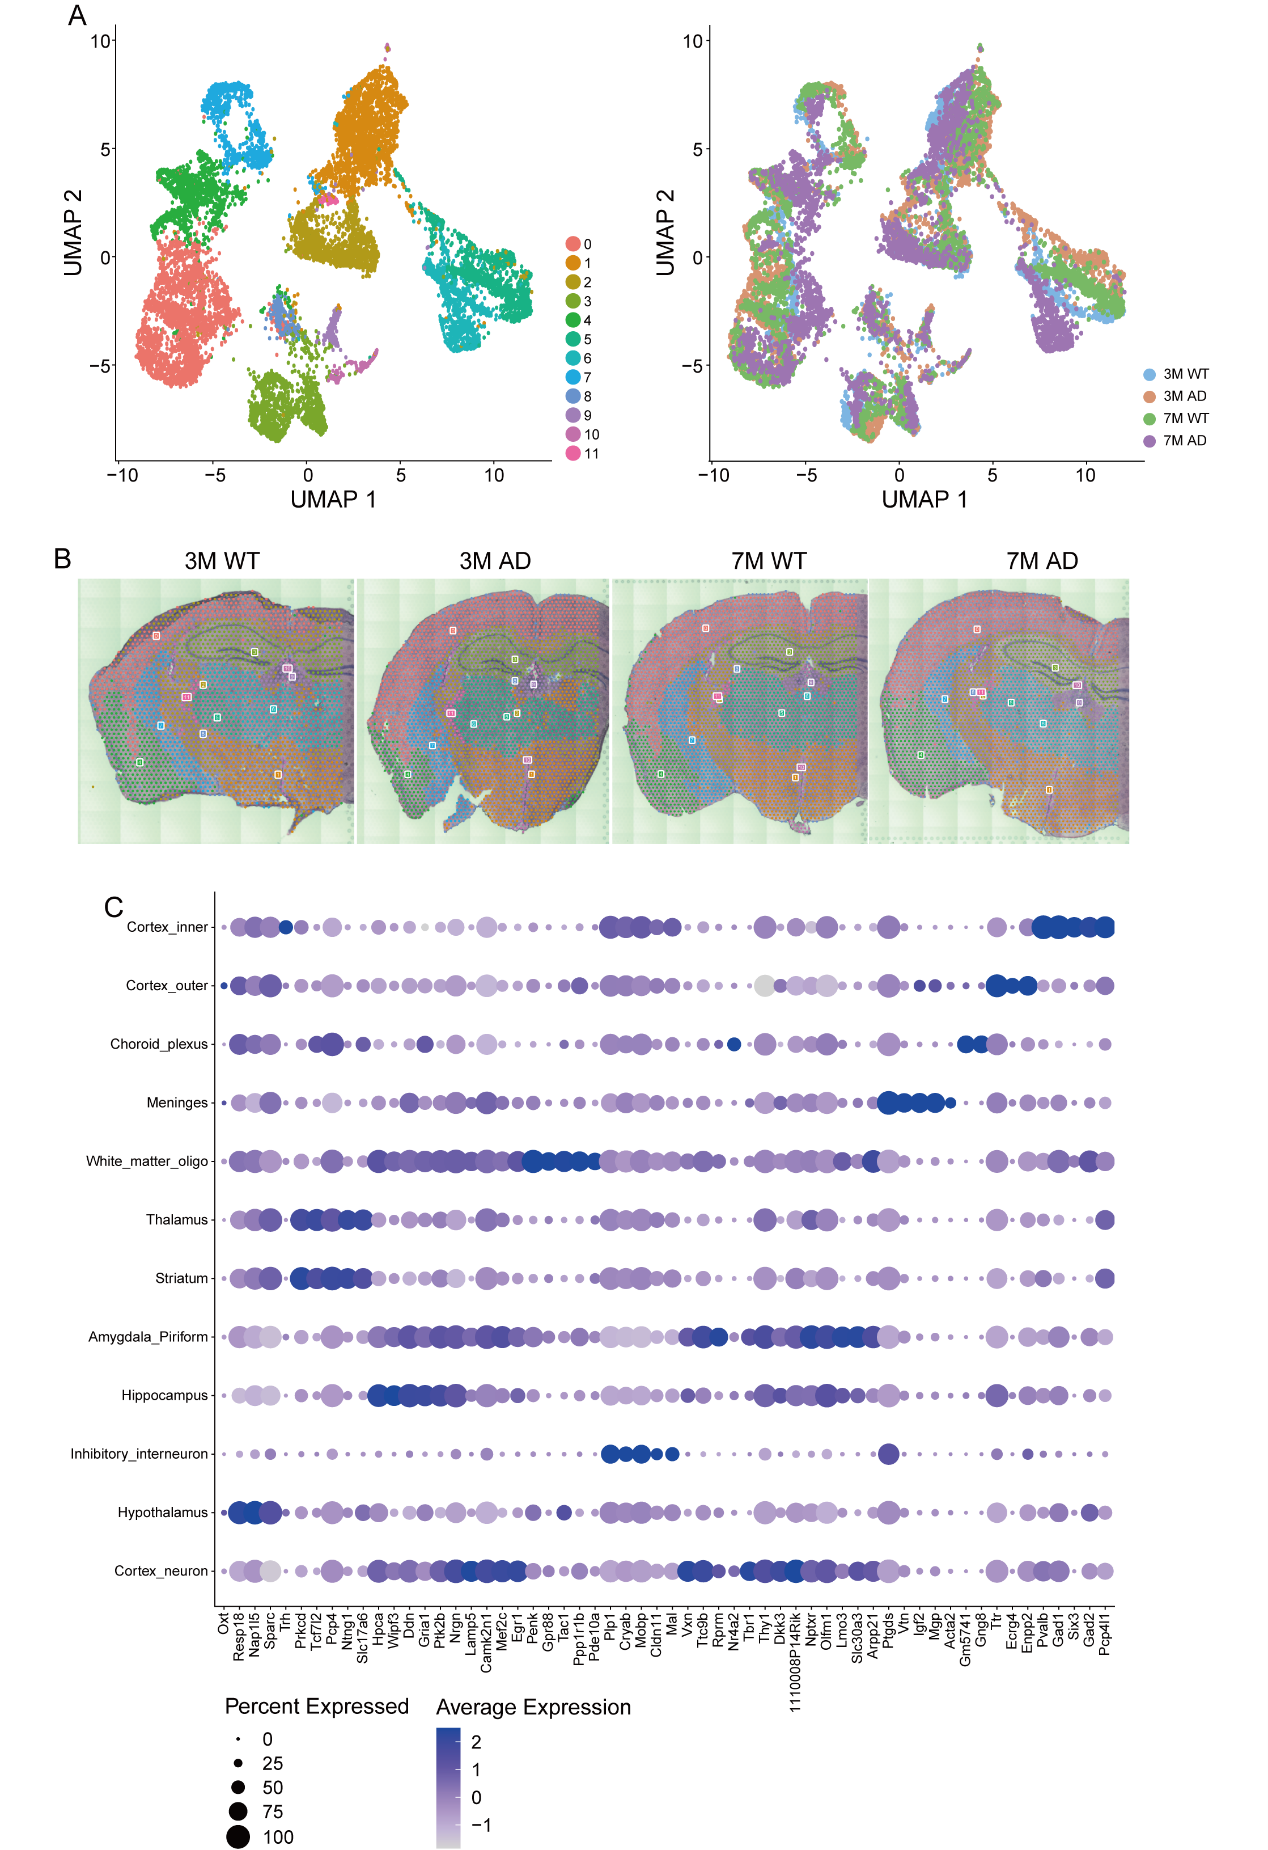


**Fig. S3 Spatial transcriptomics preprocessing and annotation. A** Batch correction analysis showing successful integration of spatial transcriptomics samples across different processing batches. **B** Unsupervised clustering analysis with spatial distribution overlay. **C** Heatmap showing expression of canonical marker genes across identified clusters.


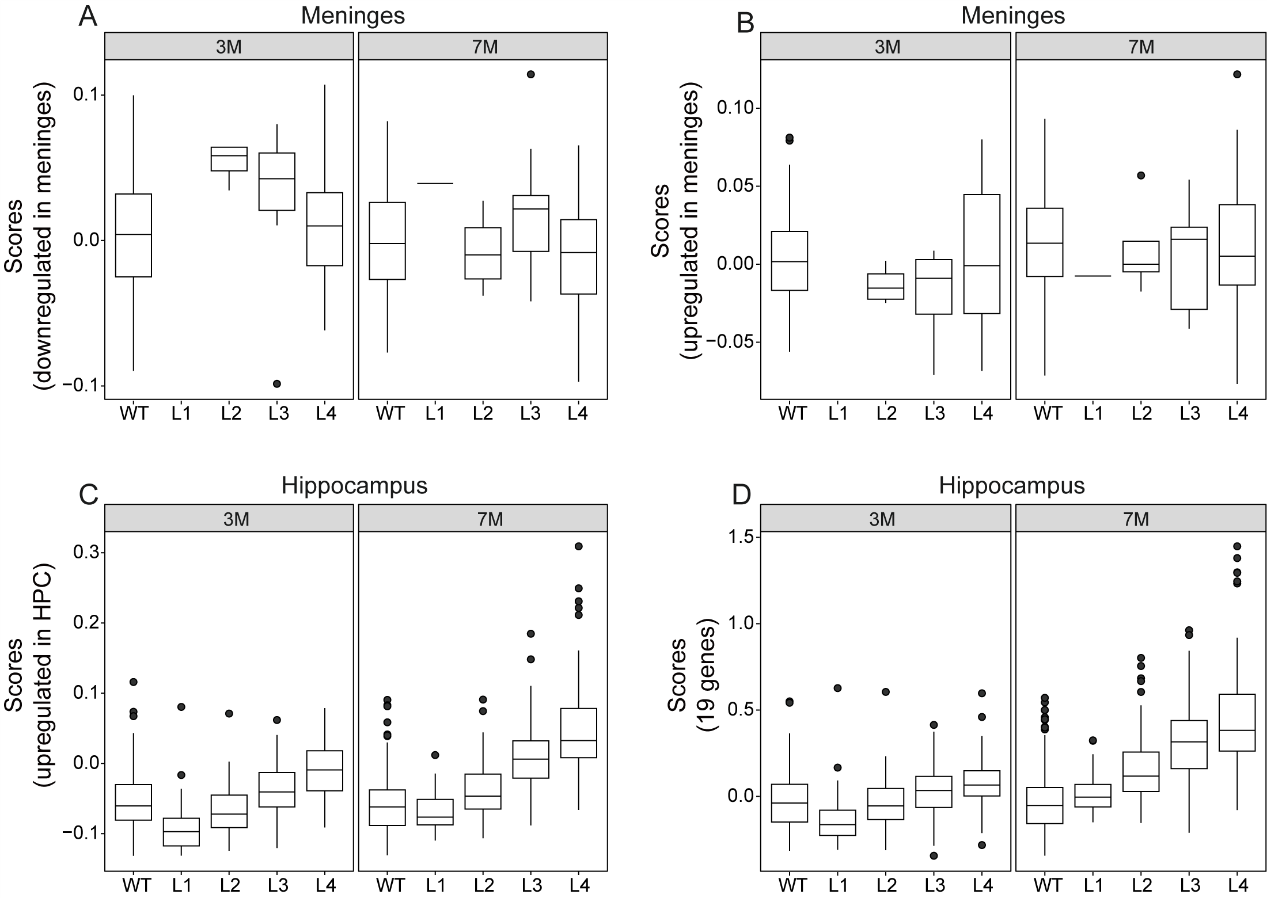


**Fig. S4** Box plots displaying disease-specific gene module scores across disease progression stages in hippocampus and meninges spots.


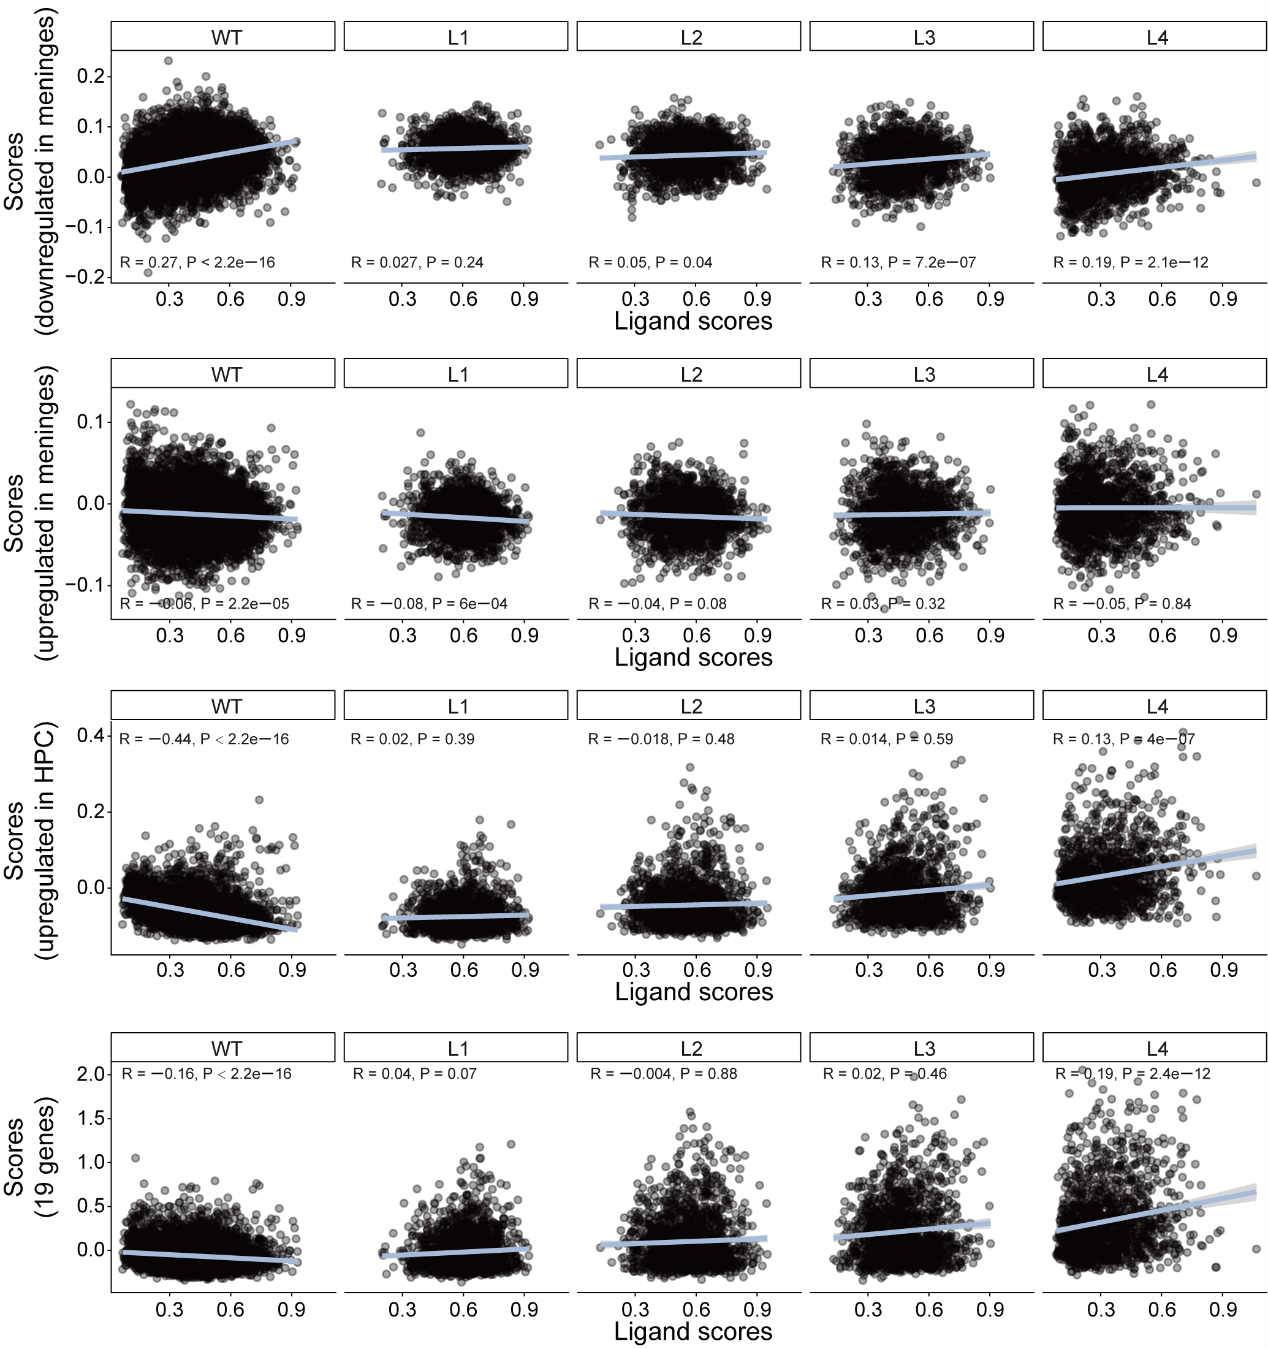


**Fig. S5** Scatter plots showing Spearman correlations between ligand expression scores with disease-specific gene modules.


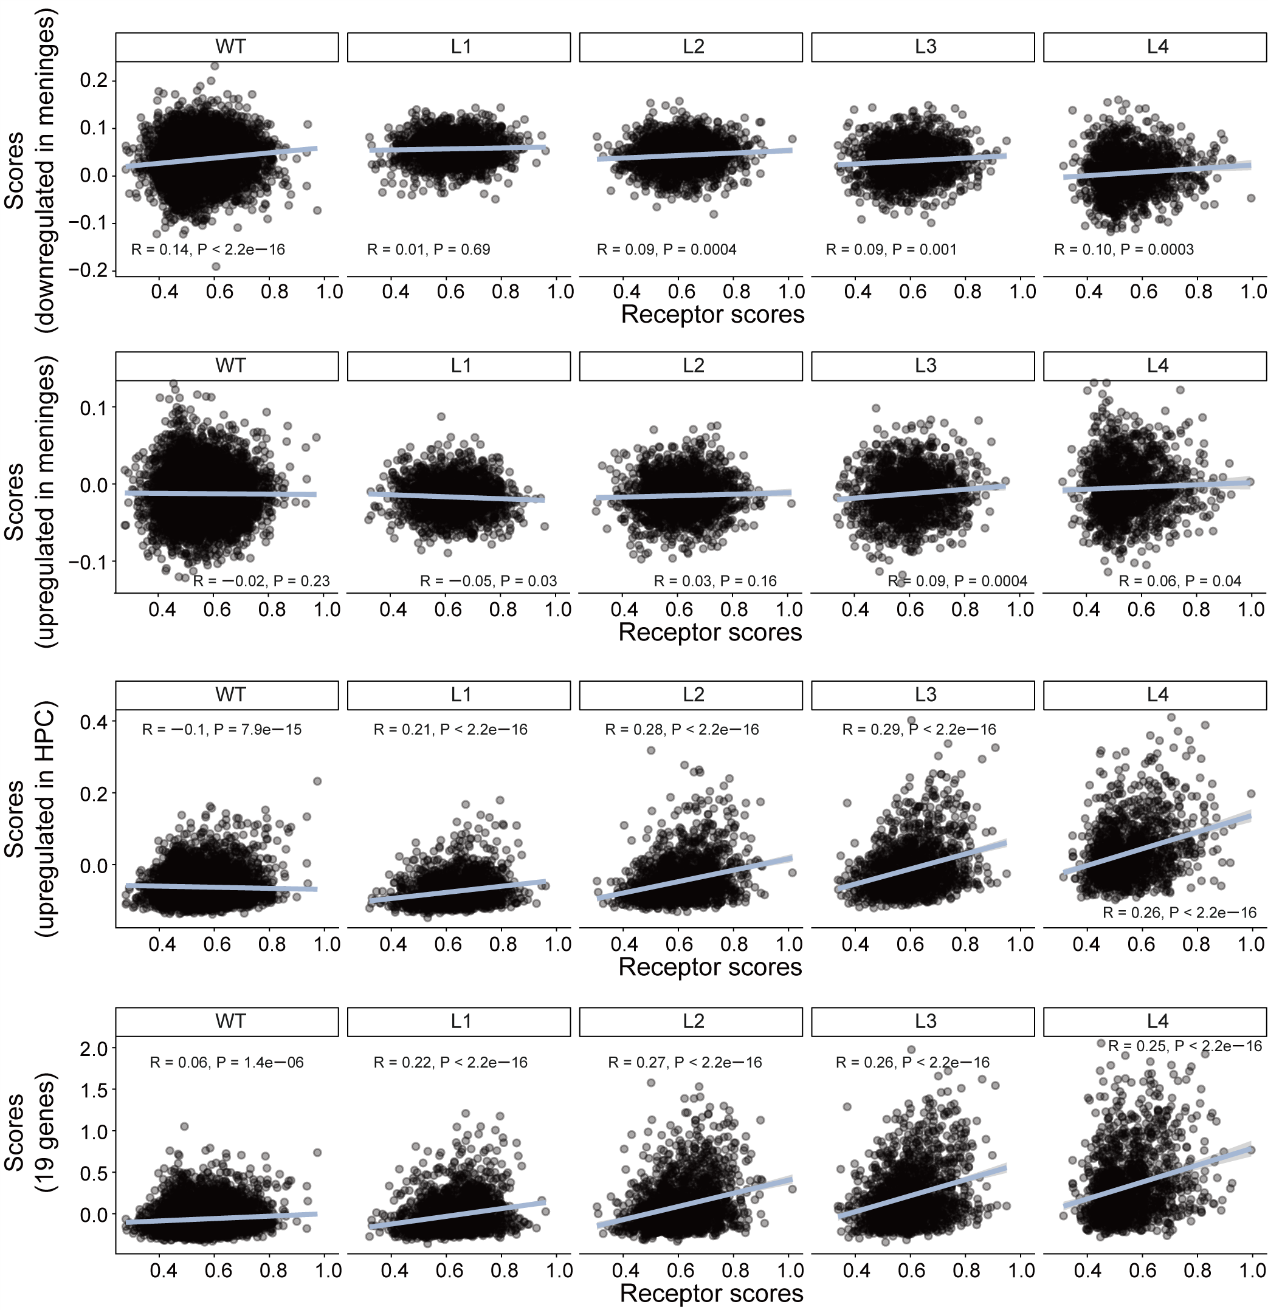


**Fig. S6** Scatter plots showing Spearman correlations between receptor expression scores with disease-specific gene modules.

**
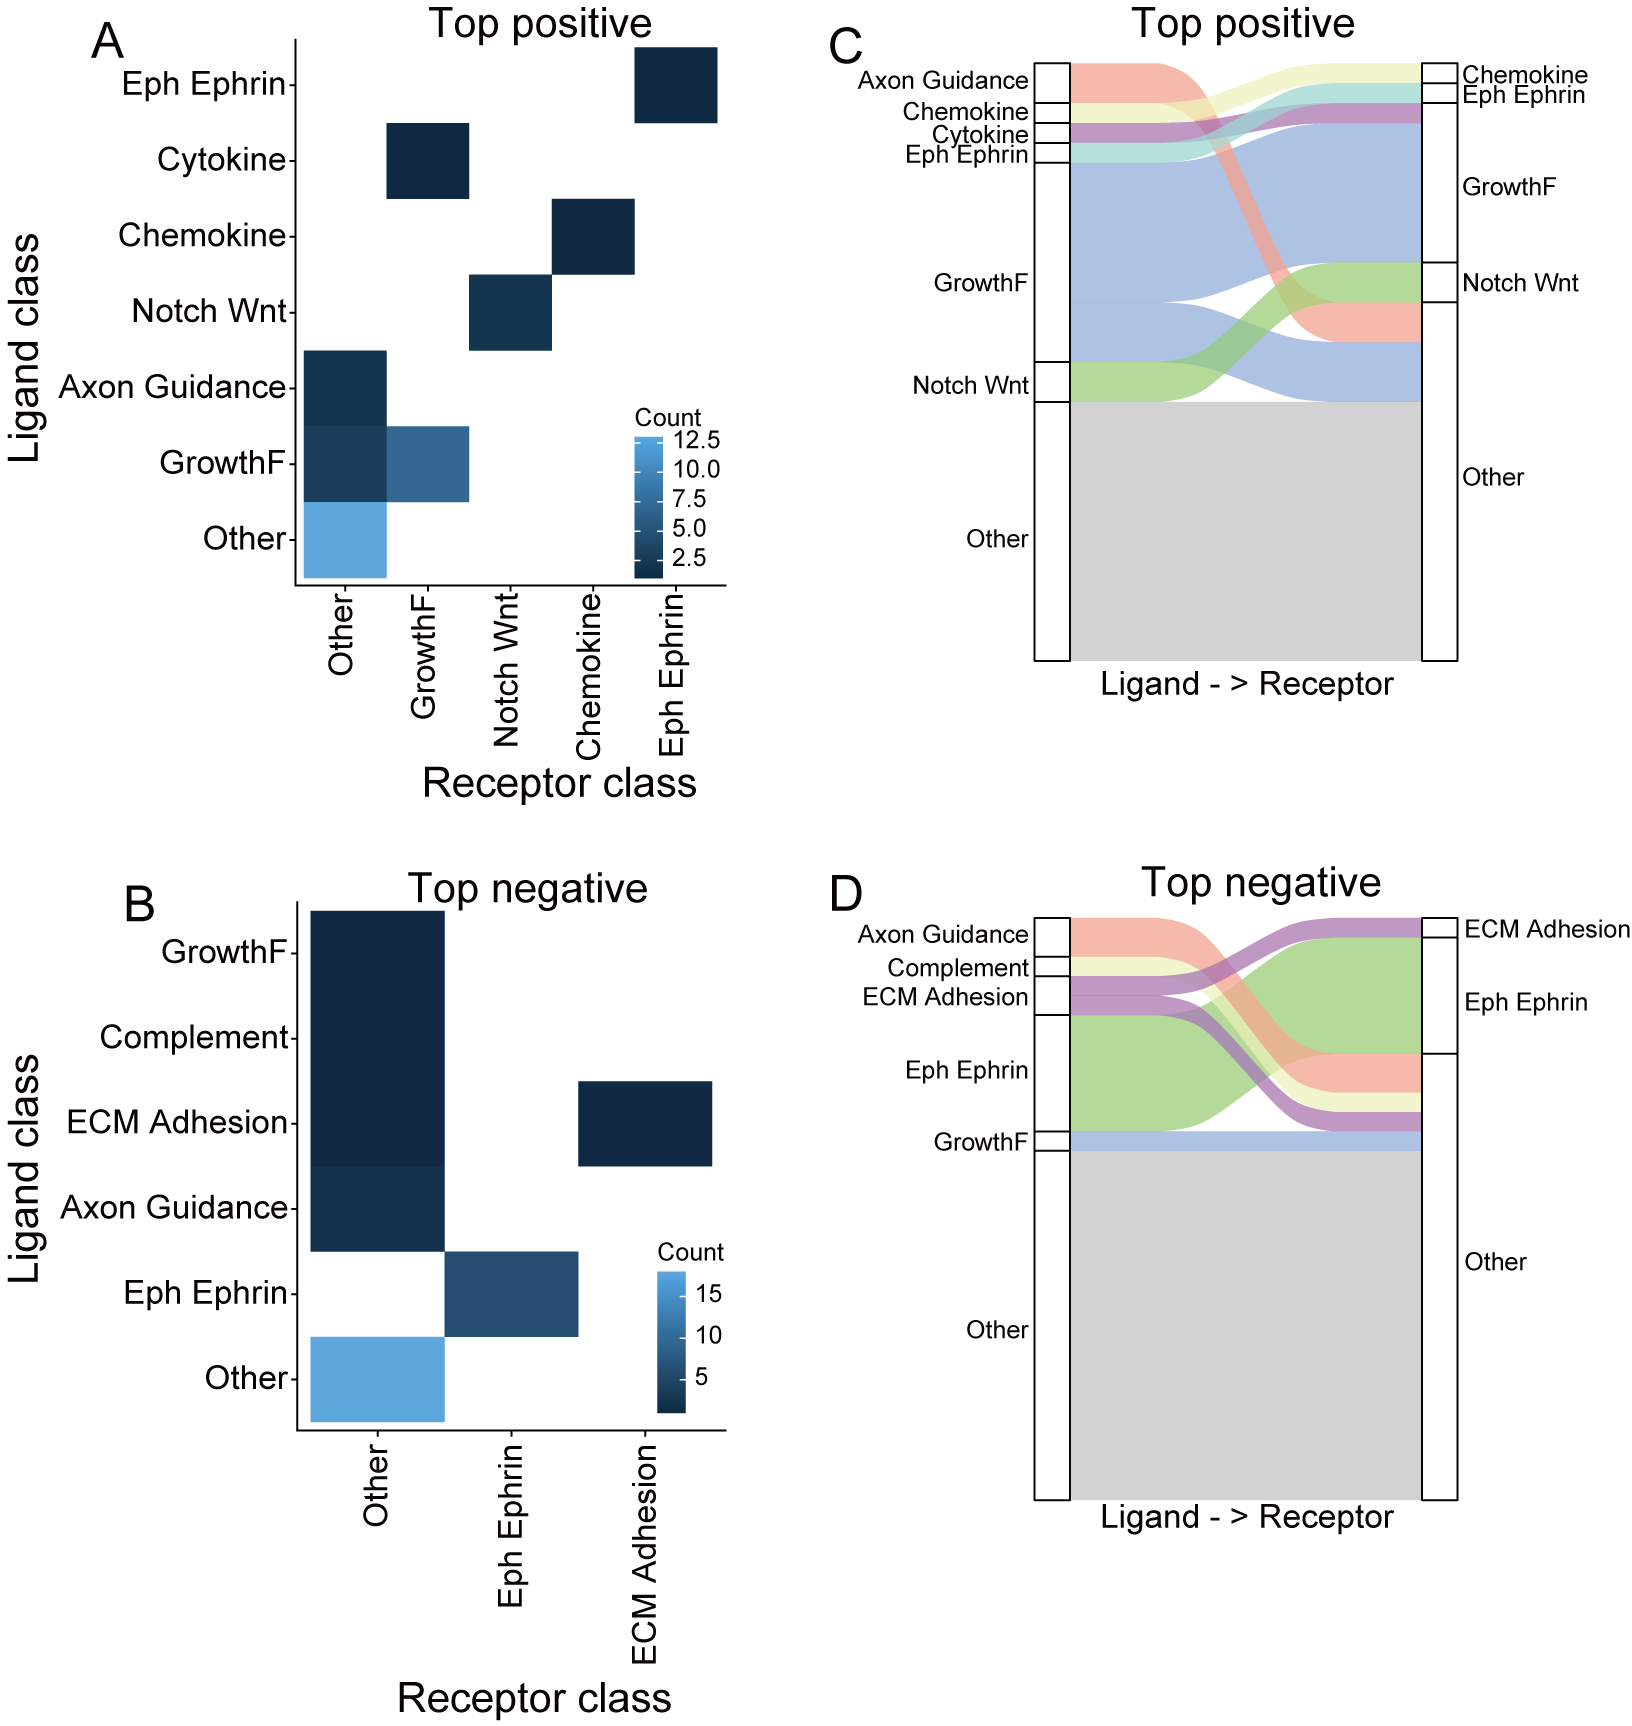
**

**Fig. S7** Heatmap and Sankey diagrams displaying top the class of ligand-receptor pairs significantly correlated with hippocampus 19 genes.


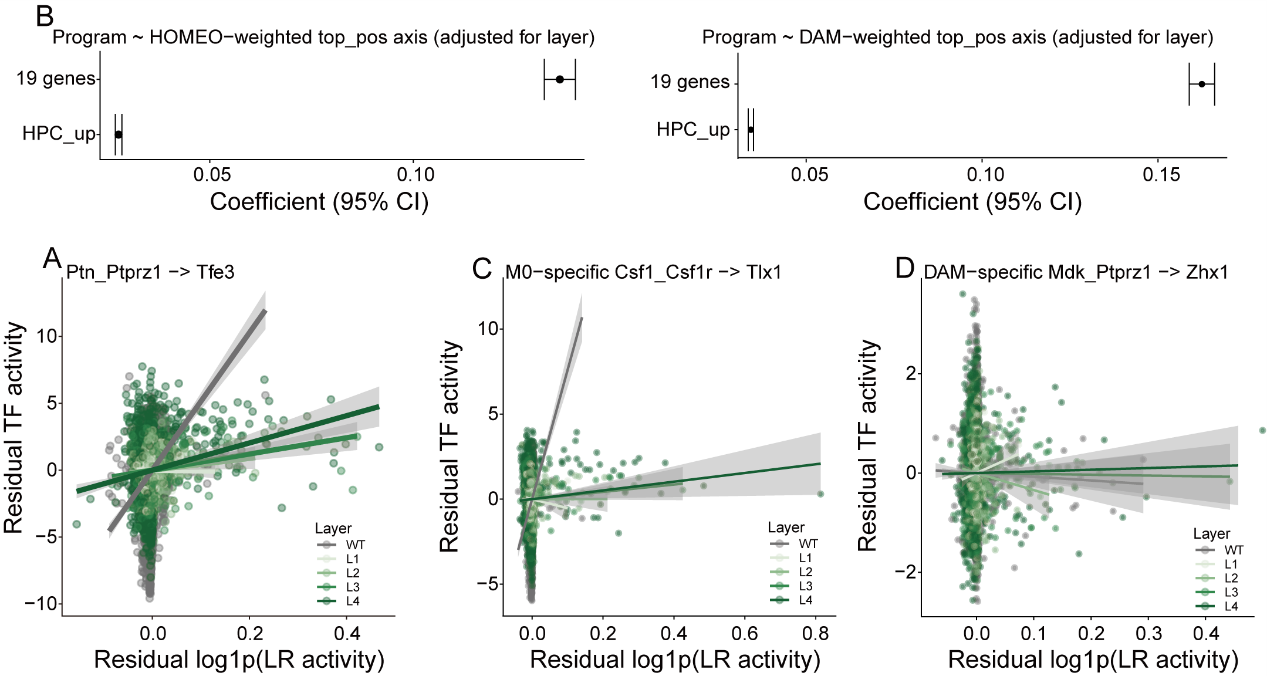


**Fig. S8 Additional TF-LR network analyses. A, C, D** Representative scatter plots showing transcription factor-ligand-receptor (TF-LR) residual correlations after controlling for disease stage and spatial effects. **B** Layer-controlled effects analysis demonstrating that TF-LR correlations remain significant after accounting for cortical layer identity.
